# Supplementary material for: Highly stable two-dimensional Ruddlesden–Popper perovskite-based resistive switching memory devices
Source: Royal Society of Chemistry journal article supplement (doi:10.1039/d4nr01395f), 2024-01-01
Supplement: d4nr01395f1.pdf [file d4nr01395f1.pdf]

## Highly Stable Two-dimensional Ruddlesden-Popper Perovskite Based Resistive Switching Memory Devices

Milon Kundar <sup>a,b#</sup>, Koushik Gayen <sup>a,b#</sup>, Rajeev Ray <sup>a,b</sup>, Dushyant Kushavah <sup>a,b</sup>, and Suman Kalyan Pal <sup>a,b\*</sup>

<sup>a</sup>School of Physical Sciences, India Institute of Technology Mandi, Kamand, Mandi-175005, Himachal Pradesh, India

<sup>b</sup>Advanced Materials Research Centre, India Institute of Technology Mandi, Kamand, Mandi-175005, Himachal Pradesh, India

<sup>#</sup>Equal contribution

AUTHOR INFORMATION

Corresponding Author

\*E-mail: [suman@iitmandi.ac.in](mailto:suman@iitmandi.ac.in); Phone: +91 1905 267040

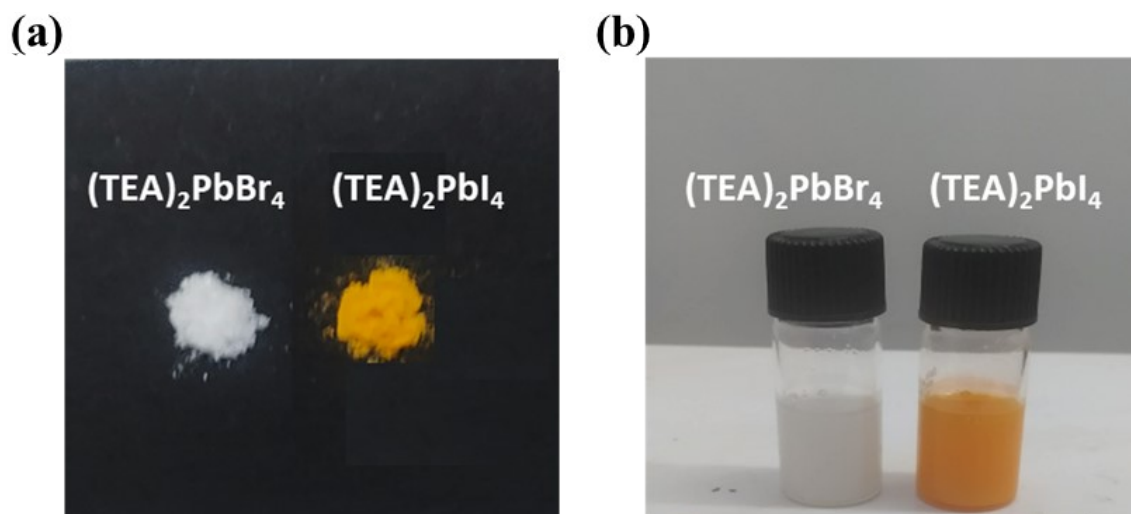

**Figure S1.** The photographs of  $(\text{TEA})_2\text{PbBr}_4$  and  $(\text{TEA})_2\text{PbI}_4$  perovskites (a) powder and (b) solution (in toluene). The photographs of uniform solutions of  $(\text{TEA})_2\text{PbBr}_4$  and  $(\text{TEA})_2\text{PbI}_4$  perovskites were taken after 5 minutes of shaking.

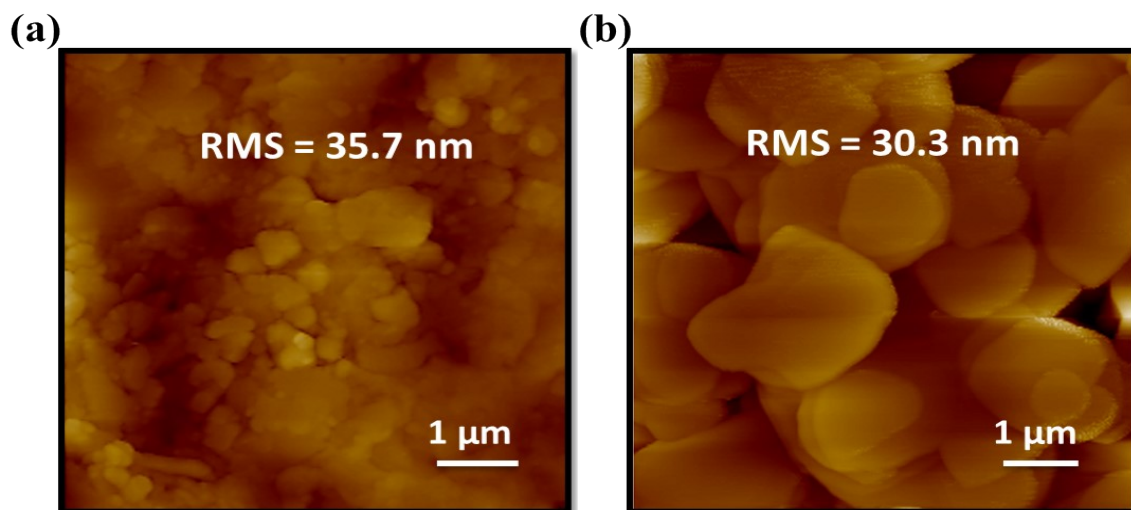

**Figure S2.** AFM images of (a)  $(\text{TEA})_2\text{PbBr}_4$  and (b)  $(\text{TEA})_2\text{PbI}_4$  perovskite films.

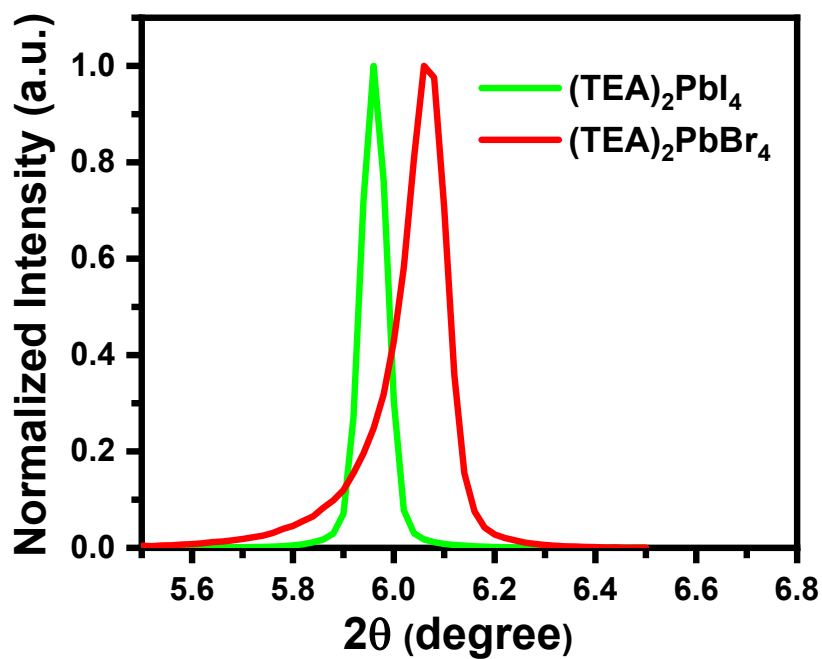

**Figure S3.** Enlarged view of low-angle diffraction peaks of  $(\text{TEA})_2\text{PbBr}_4$  and  $(\text{TEA})_2\text{PbI}_4$  perovskite films.

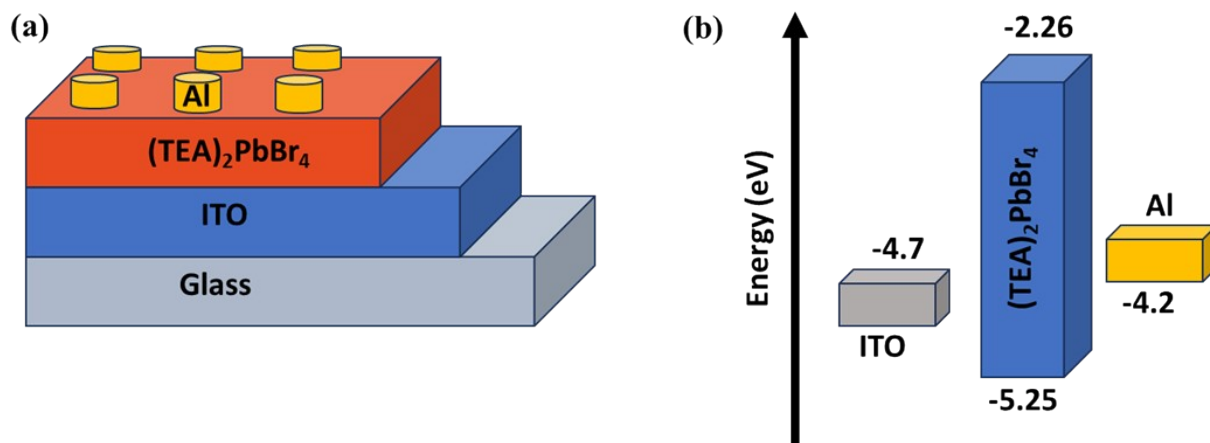

**Figure S4.** (a) Schematic illustration of (TEA)<sub>2</sub>PbBr<sub>4</sub>-based ReRAM device structure. (b) Visualization of energy levels of all components within the device.

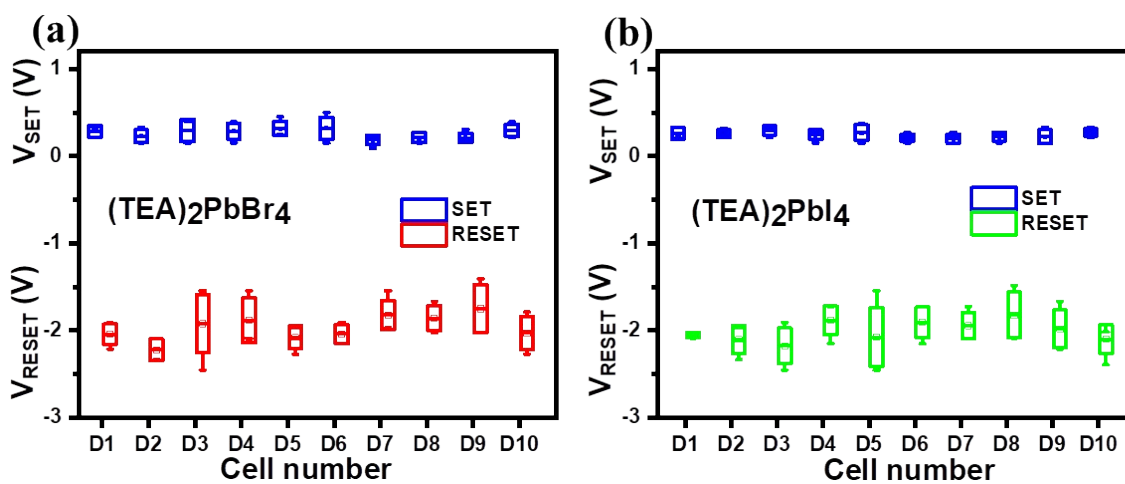

**Figure S5.** SET and RESET voltage distributions of 10 different cells fabricated using (a) (TEA)<sub>2</sub>PbBr<sub>4</sub> and (b) (TEA)<sub>2</sub>PbI<sub>4</sub> perovskites. DN (N= 1,...,10) represents device number.

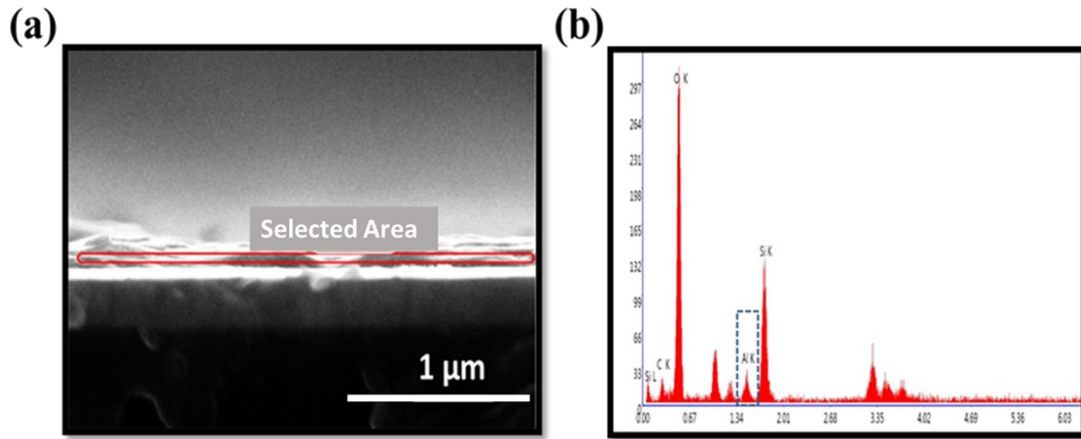

**Figure S6.** (a) The cross-sectional SEM image of  $(\text{TEA})_2\text{PbI}_4$ -based ReRAM device. (b) EDS spectrum measured in a specific cross-sectional perovskite area (indicated by a box) of the device. The spectrum of Al is shown by a dotted area.

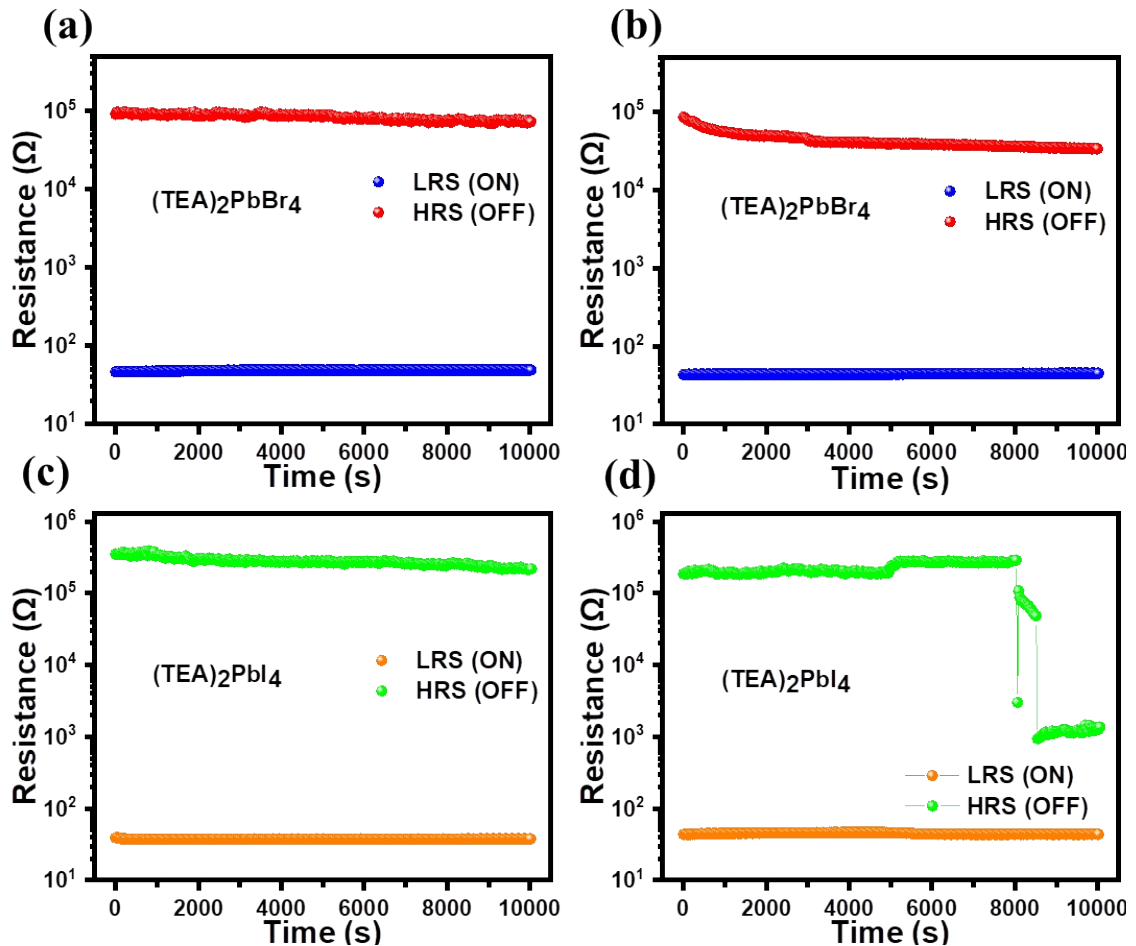

**Figure S7.** The retention properties of the ON and OFF states of  $(\text{TEA})_2\text{PbBr}_4$  PRM device measured on (a) 1<sup>st</sup> and (b) 45<sup>th</sup> day, and of  $(\text{TEA})_2\text{PbI}_4$  PRM cell measured on (c) 1<sup>st</sup> and (d) 45<sup>th</sup> day.
